# Supplementary material for: Risk factors for post-COVID-19 condition in previously hospitalised children using the ISARIC Global follow-up protocol: a prospective cohort study
Source: PubMed Central journal article supplement — Eur Respir J. 2022 Feb 3;59(2):2101341. doi: 10.1183/13993003.01341-2021 (PMC8576804; doi:10.1183/13993003.01341-2021), 2022-02-03
Supplement: ERJ-01341-2021.Shareable.pdf [file ERJ-01341-2021.Shareable.pdf]

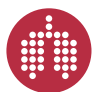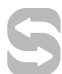

SHAREABLE PDF

# Risk factors for post-COVID-19 condition in previously hospitalised children using the ISARIC Global follow-up protocol: a prospective cohort study

Ismail M. Osmanov<sup>1,2,29</sup>, Ekaterina Spiridonova<sup>3,29</sup>, Polina Bobkova<sup>3,29</sup>, Aysylu Gamirova<sup>3,29</sup>, Anastasia Shikhaleva<sup>3,29</sup>, Margarita Andreeva<sup>3,29</sup>, Oleg Blyuss<sup>3,4,29</sup>, Yasmin El-Taravi<sup>3</sup>, Audrey DunnGalvin<sup>3,5</sup>, Pasquale Comberiat<sup>6</sup>, Diego G. Peroni , Christian Apfelbacher<sup>7</sup>, Jon Genuneit , Lyudmila Mazankova , Alexandra Miroshina<sup>1</sup>, Evgeniya Chistyakova<sup>10</sup>, Elmira Samitova<sup>1,9</sup>, Svetlana Borzakova<sup>2,11</sup>, Elena Bondarenko<sup>3</sup>, Anatoliy A. Korsunskiy<sup>3</sup>, Irina Konova , Sarah Wulf Hanson<sup>12</sup>, Gail Carson<sup>13</sup>, Louise Sigfrid , Janet T. Scott<sup>14</sup>, Matthew Greenhawt<sup>15</sup>, Elizabeth A. Whittaker<sup>16</sup>, Elena Garralda<sup>17</sup>, Olivia V. Swann<sup>18,19</sup>, Danilo Buonsenso , Dasha E. Nicholls<sup>17</sup>, Frances Simpson<sup>23</sup>, Christina Jones , Malcolm G. Semple , John O. Warner<sup>27</sup>, Theo Vos<sup>12</sup>, Piero Olliaro<sup>13</sup>, Daniel Munblit  and the Sechenov StopCOVID Research Team<sup>30</sup>

<sup>1</sup>Z.A. Bashlyaeva Children's Municipal Clinical Hospital, Moscow, Russia. <sup>2</sup>Pirogov Russian National Research Medical University, Moscow, Russia. <sup>3</sup>Dept of Paediatrics and Paediatric Infectious Diseases, Institute of Child's Health, Sechenov First Moscow State Medical University (Sechenov University), Moscow, Russia. <sup>4</sup>School of Physics, Astronomy and Mathematics, University of Hertfordshire, Hatfield, UK. <sup>5</sup>School of Applied Psychology, University College Cork, Cork City, Ireland. <sup>6</sup>Dept of Clinical and Experimental Medicine, Section of Pediatrics, University of Pisa, Pisa, Italy. <sup>7</sup>Institute of Social Medicine and Health Systems Research, Faculty of Medicine, Otto von Guericke University Magdeburg, Magdeburg, Germany. <sup>8</sup>Pediatric Epidemiology, Dept of Pediatrics, Medical Faculty, Leipzig University, Leipzig, Germany. <sup>9</sup>Russian Medical Academy of Continuous Professional Education of the Ministry of Healthcare of the Russian Federation, Moscow, Russia. <sup>10</sup>Dept of Paediatrics and Paediatric Rheumatology, Institute of Child's Health, Sechenov First Moscow State Medical University (Sechenov University), Moscow, Russia. <sup>11</sup>Research Institute for Healthcare Organization and Medical Management of Moscow Healthcare Dept, Moscow, Russia. <sup>12</sup>Institute for Health Metrics and Evaluation, University of Washington, Seattle, WA, USA. <sup>13</sup>ISARIC Global Support Centre, Nuffield Dept of Medicine, University of Oxford, Oxford, UK. <sup>14</sup>MRC-University of Glasgow Centre for Virus Research, Glasgow, UK. <sup>15</sup>Dept of Pediatrics, Section of Allergy/Immunology, Children's Hospital Colorado, University of Colorado School of Medicine, Aurora, CO, USA. <sup>16</sup>Paediatric Infectious Diseases, Imperial College Healthcare NHS Trust, London, UK. <sup>17</sup>Division of Psychiatry, Imperial College London, London, UK. <sup>18</sup>Dept of Child Life and Health, University of Edinburgh, Edinburgh, UK. <sup>19</sup>Paediatric Infectious Diseases, Royal Hospital for Children, Glasgow, UK. <sup>20</sup>Dept of Woman and Child Health and Public Health, Fondazione Policlinico Universitario A. Gemelli IRCCS, Rome, Italy. <sup>21</sup>Dipartimento di Scienze Biotechnologiche di Base, Cliniche Intensivologiche e Perioperatorie, Università Cattolica del Sacro Cuore, Rome, Italy. <sup>22</sup>Center for Global Health Research and Studies, Università Cattolica del Sacro Cuore, Rome, Italy. <sup>23</sup>Coventry University, Coventry, UK. <sup>24</sup>School of Psychology, Faculty of Health and Medical Sciences, University of Surrey, Guildford, UK. <sup>25</sup>Health Protection Research Unit in Emerging and Zoonotic Infections, Institute of Infection, Veterinary and Ecological Sciences, Faculty of Health and Life Sciences, University of Liverpool, Liverpool, UK. <sup>26</sup>Dept of Respiratory Medicine, Alder Hey Children's Hospital, Liverpool, UK. <sup>27</sup>Inflammation, Repair and Development Section, National Heart and Lung Institute, Faculty of Medicine, Imperial College London, London, UK. <sup>28</sup>Research and Clinical Center for Neuropsychiatry, Moscow, Russia. <sup>29</sup>These authors contributed equally to this article. <sup>30</sup>A list of members of the Sechenov StopCOVID Research Team can be found in the Acknowledgements section.

Corresponding author: Daniel Munblit ([daniel.munblit08@imperial.ac.uk](mailto:daniel.munblit08@imperial.ac.uk))

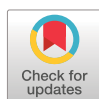

Shareable abstract (@ERSpublications)

**A quarter of children experienced persistent symptoms months after COVID-19 infection, with almost one in 10 experiencing multisystem involvement. Older age and allergic diseases were associated with higher risk of persistent symptoms at follow-up.** <https://bit.ly/3vqeEmZ>

**Cite this article as:** Osmanov IM, Spiridonova E, Bobkova P, *et al.* Risk factors for post-COVID-19 condition in previously hospitalised children using the ISARIC Global follow-up protocol: a prospective cohort study. *Eur Respir J* 2022; 59: 2101341 [DOI: 10.1183/13993003.01341-2021].

This single-page version can be shared freely online.

## Abstract

Copyright ©The authors 2022.

This version is distributed under the terms of the Creative Commons Attribution Non-Commercial Licence 4.0. For commercial reproduction rights and permissions contact [permissions@ersnet.org](mailto:permissions@ersnet.org)

This article has an editorial commentary:

<https://doi.org/10.1183/13993003.02245-2021>

Received: 10 May 2021

Accepted: 9 June 2021

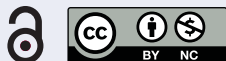

**Background** The long-term sequelae of coronavirus disease 2019 (COVID-19) in children remain poorly characterised. This study aimed to assess long-term outcomes in children previously hospitalised with COVID-19 and associated risk factors.

**Methods** This is a prospective cohort study of children ( $\leq 18$  years old) admitted to hospital with confirmed COVID-19. Children admitted between 2 April 2020 and 26 August 2020 were included. Telephone interviews used the International Severe Acute Respiratory and Emerging Infection Consortium (ISARIC) COVID-19 Health and Wellbeing Follow-up Survey for Children. Persistent symptoms ( $> 5$  months) were further categorised by system(s) involved.

**Results** 518 out of 853 (61%) eligible children were available for the follow-up assessment and included in the study. Median (interquartile range (IQR)) age was 10.4 (3–15.2) years and 270 (52.1%) were girls. Median (IQR) follow-up since hospital discharge was 256 (223–271) days. At the time of the follow-up interview 126 (24.3%) participants reported persistent symptoms, among which fatigue (53, 10.7%), sleep disturbance (36, 6.9%) and sensory problems (29, 5.6%) were the most common. Multiple symptoms were experienced by 44 (8.4%) participants. Risk factors for persistent symptoms were: older age “6–11 years” (OR 2.74, 95% CI 1.37–5.75) and “12–18 years” (OR 2.68, 95% CI 1.41–5.4), and a history of allergic diseases (OR 1.67, 95% CI 1.04–2.67).

**Conclusions** A quarter of children experienced persistent symptoms months after hospitalisation with acute COVID-19 infection, with almost one in 10 experiencing multisystem involvement. Older age and allergic diseases were associated with higher risk of persistent symptoms at follow-up.
